# Supplementary material for: Quantifying the Impact of Climate Change on Peak Stream Discharge for Watersheds of Varying Sizes in the Coastal Plain of Virginia
Source: Atypon-hosted journal article supplement (doi:10.1061/jhyeff.heeng-6114), 2024-03-30
Supplement: supplemental materials_jhyeff.heeng-6114_morsy.pdf [file supplemental%20materials_jhyeff.heeng-6114_morsy.pdf]

## SUPPLEMENTAL MATERIALS

*ASCE Journal of Hydrologic Engineering*

# Quantifying the Impact of Climate Change on Peak Stream Discharge for Watersheds of Varying Sizes in the Coastal Plain of Virginia

Mohamed M. Morsy, Binata Roy, Yawen Shen, Jeffrey M. Sadler,  
Alexander B. Chen, Faria T. Zahura, and Jonathan L. Goodall

**DOI:** 10.1061/JHYEFF.HEENG-6114

© ASCE 2024

[www.ascelibrary.org](http://www.ascelibrary.org)

Table S1. Selected NOAA weather stations for the IDF curve development. Bold font indicates a station used to create precipitation inputs for the 2D hydrodynamic TUFLOW model.

| <b>No.</b> | <b>Station ID</b> | <b>Station Name</b>             | <b>Latitude</b> | <b>Longitude</b> | <b>Elevation (m)</b> | <b>Start</b> | <b>End</b> | <b>Record Length (years)</b> |
|------------|-------------------|---------------------------------|-----------------|------------------|----------------------|--------------|------------|------------------------------|
| <b>1</b>   | USC00441136       | Buckingham                      | 37.5083         | -78.5333         | 176.8                | 1894         | 2019       | 125                          |
| <b>2</b>   | USC00441209       | Burkes Garden                   | 37.0908         | -81.33639        | 935.1                | 1896         | 2019       | 123                          |
| <b>3</b>   | USC00441593       | Charlottesville 2 W             | 38.0329         | -78.5226         | 264                  | 1892         | 2019       | 127                          |
| <b>4</b>   | USC00441614       | Chatham                         | 36.8224         | -79.4104         | 198.4                | 1922         | 2019       | 97                           |
| <b>5</b>   | USC00441955       | Concord 4 SSW                   | 37.2819         | -78.9591         | 248.4                | 1950         | 2019       | 69                           |
| <b>6</b>   | USC00441999       | Copper Hill                     | 37.08169        | -80.13486        | 870.8                | 1940         | 2019       | 79                           |
| <b>7</b>   | USC00442208       | Dale Enterprise                 | 38.4547         | -78.9352         | 413.9                | 1892         | 2019       | 127                          |
| <b>8</b>   | USC00442790       | Emporia 1 WNW                   | 36.6983         | -77.5597         | 30.5                 | 1892         | 2019       | 127                          |
| <b>9</b>   | USC00442941       | Farmville 2 N                   | 37.3263         | -78.3864         | 137.2                | 1897         | 2019       | 122                          |
| <b>10</b>  | USC00444044       | Holland 1 E                     | 36.683          | -76.7684         | 24.4                 | 1933         | 2018       | 85                           |
| <b>11</b>  | USC00444101       | Hopewell                        | 37.2992         | -77.2775         | 12.2                 | 1916         | 2019       | 103                          |
| <b>12</b>  | USC00444148       | Huddleston 4 SW                 | 37.12587        | -79.5251         | 273.4                | 1950         | 2019       | 69                           |
| <b>13</b>  | USC00444414       | John H Kerr Dam                 | 36.6002         | -78.3011         | 76.2                 | 1948         | 2019       | 71                           |
| <b>14</b>  | USC00444876       | Lexington                       | 37.7767         | -79.4385         | 334.4                | 1889         | 2019       | 130                          |
| <b>15</b>  | USC00445050       | Louisa                          | 38.0421         | -78.0061         | 128                  | 1916         | 2019       | 103                          |
| <b>16</b>  | USC00445096       | Luray 5 E                       | 38.6661         | -78.3727         | 426.7                | 1941         | 2019       | 78                           |
| <b>17</b>  | USC00445851       | Mount Weather                   | 39.0643         | -77.8883         | 505.7                | 1914         | 2017       | 103                          |
| <b>18</b>  | USC00446712       | Piedmont Research Station       | 38.2323         | -78.1202         | 158.5                | 1946         | 2019       | 73                           |
| <b>19</b>  | USC00448192       | Suffolk Lake Kilby              | 36.7297         | -76.6015         | 6.7                  | 1945         | 2019       | 74                           |
| <b>20</b>  | USC00448737       | Vienna                          | 38.8922         | -77.2892         | 127.4                | 1925         | 2019       | 94                           |
| <b>21</b>  | USC00448829       | Walkerton 2 NW                  | 37.7434         | -77.04           | 15.2                 | 1932         | 2019       | 87                           |
| <b>22</b>  | USC00448894       | Warsaw 2 NW                     | 37.9881         | -76.7769         | 42.7                 | 1892         | 2019       | 127                          |
| <b>23</b>  | USC00449151       | Williamsburg 2 N                | 37.3017         | -76.7039         | 21.3                 | 1948         | 2019       | 71                           |
| <b>24</b>  | USC00449263       | Woodstock 2 NE                  | 38.8969         | -78.4679         | 205.7                | 1889         | 2019       | 130                          |
| <b>25</b>  | USC00449301       | Wytheville                      | 36.9617         | -81.087          | 749.2                | 1892         | 2019       | 127                          |
| <b>26</b>  | USW00013733       | Lynchburg International Airport | 37.3208         | -79.2067         | 286.5                | 1944         | 2019       | 75                           |
| <b>27</b>  | USW00013737       | Norfolk International Airport   | 36.9033         | -76.1922         | 9.1                  | 1945         | 2019       | 74                           |
| <b>28</b>  | USW00013740       | Richmond International Airport  | 37.51151        | -77.32344        | 50                   | 1939         | 2019       | 80                           |
| <b>29</b>  | USW00013741       | Roanoke International Airport   | 37.3169         | -79.9741         | 358.1                | 1947         | 2019       | 72                           |

Table S2. Combinations of twenty-eight future IDF scenarios for seven return periods under two RCP scenarios on two target years (mid-century and end of the century).

| <b>Combinations</b> | <b>RCP_Time_Return period</b> | <b>Combinations</b> | <b>RCP_Time_Return period</b> |
|---------------------|-------------------------------|---------------------|-------------------------------|
| <b>S1</b>           | RCP4.5_2045_1                 | S15                 | RCP8.5_2045_1                 |
| <b>S2</b>           | RCP4.5_2045_2                 | S16                 | RCP8.5_2045_2                 |
| <b>S3</b>           | RCP4.5_2045_5                 | S17                 | RCP8.5_2045_5                 |
| <b>S4</b>           | RCP4.5_2045_10                | S18                 | RCP8.5_2045_10                |
| <b>S5</b>           | RCP4.5_2045_25                | S19                 | RCP8.5_2045_25                |
| <b>S6</b>           | RCP4.5_2045_50                | S20                 | RCP8.5_2045_50                |
| <b>S7</b>           | RCP4.5_2045_100               | S21                 | RCP8.5_2045_100               |
| <b>S8</b>           | RCP4.5_2085_1                 | S22                 | RCP8.5_2085_1                 |
| <b>S9</b>           | RCP4.5_2085_2                 | S23                 | RCP8.5_2085_2                 |
| <b>S10</b>          | RCP4.5_2085_5                 | S24                 | RCP8.5_2085_5                 |
| <b>S11</b>          | RCP4.5_2085_10                | S25                 | RCP8.5_2085_10                |
| <b>S12</b>          | RCP4.5_2085_25                | S26                 | RCP8.5_2085_25                |
| <b>S13</b>          | RCP4.5_2085_50                | S27                 | RCP8.5_2085_50                |
| <b>S14</b>          | RCP4.5_2085_100               | S28                 | RCP8.5_2085_100               |

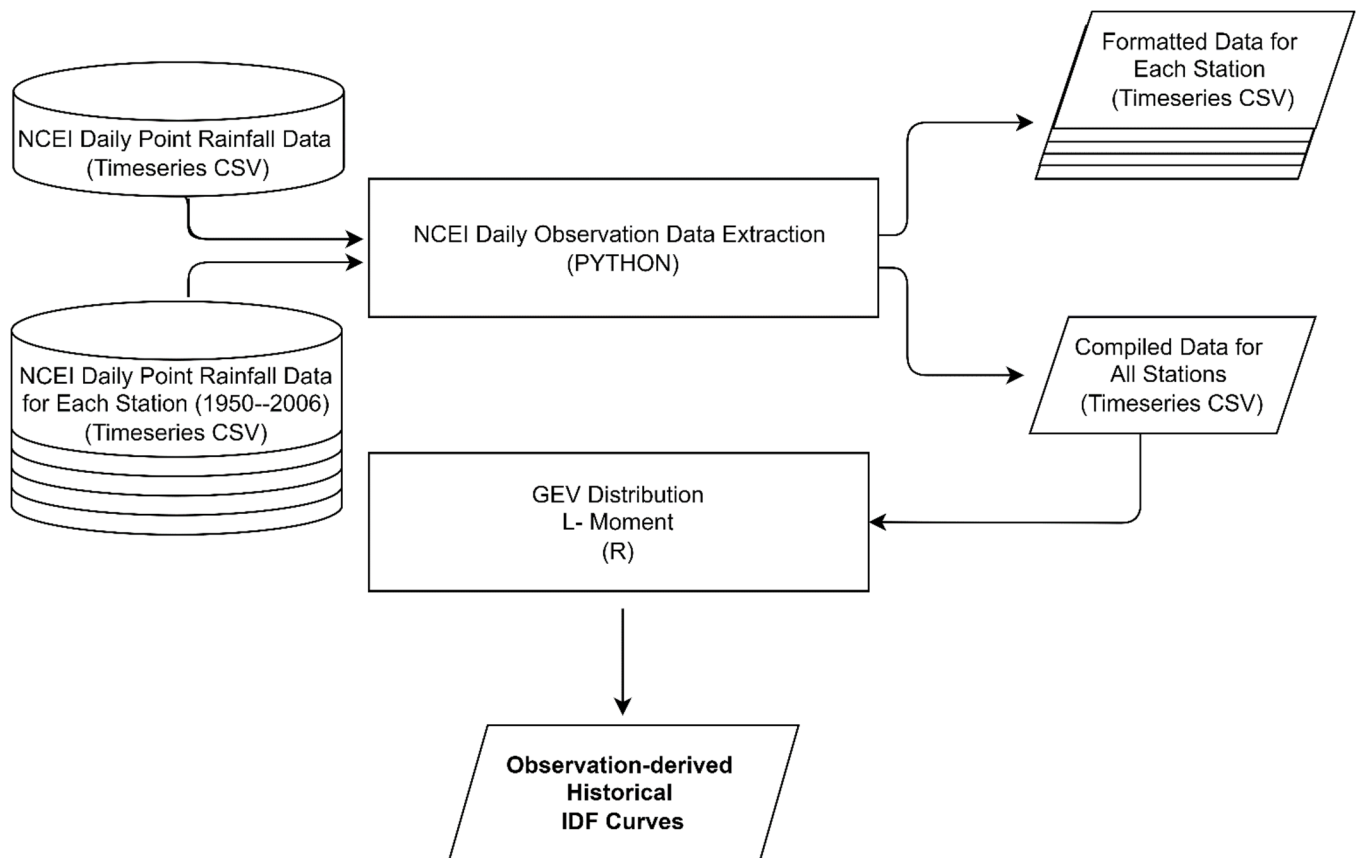

Fig. S1. Workflow for producing observation-derived historical IDF curves from historical data. Analysis steps are shown as rectangles, key input datasets are shown as cylinders, key result datasets are shown as parallelograms and final result is shown as parallelograms with bold font.

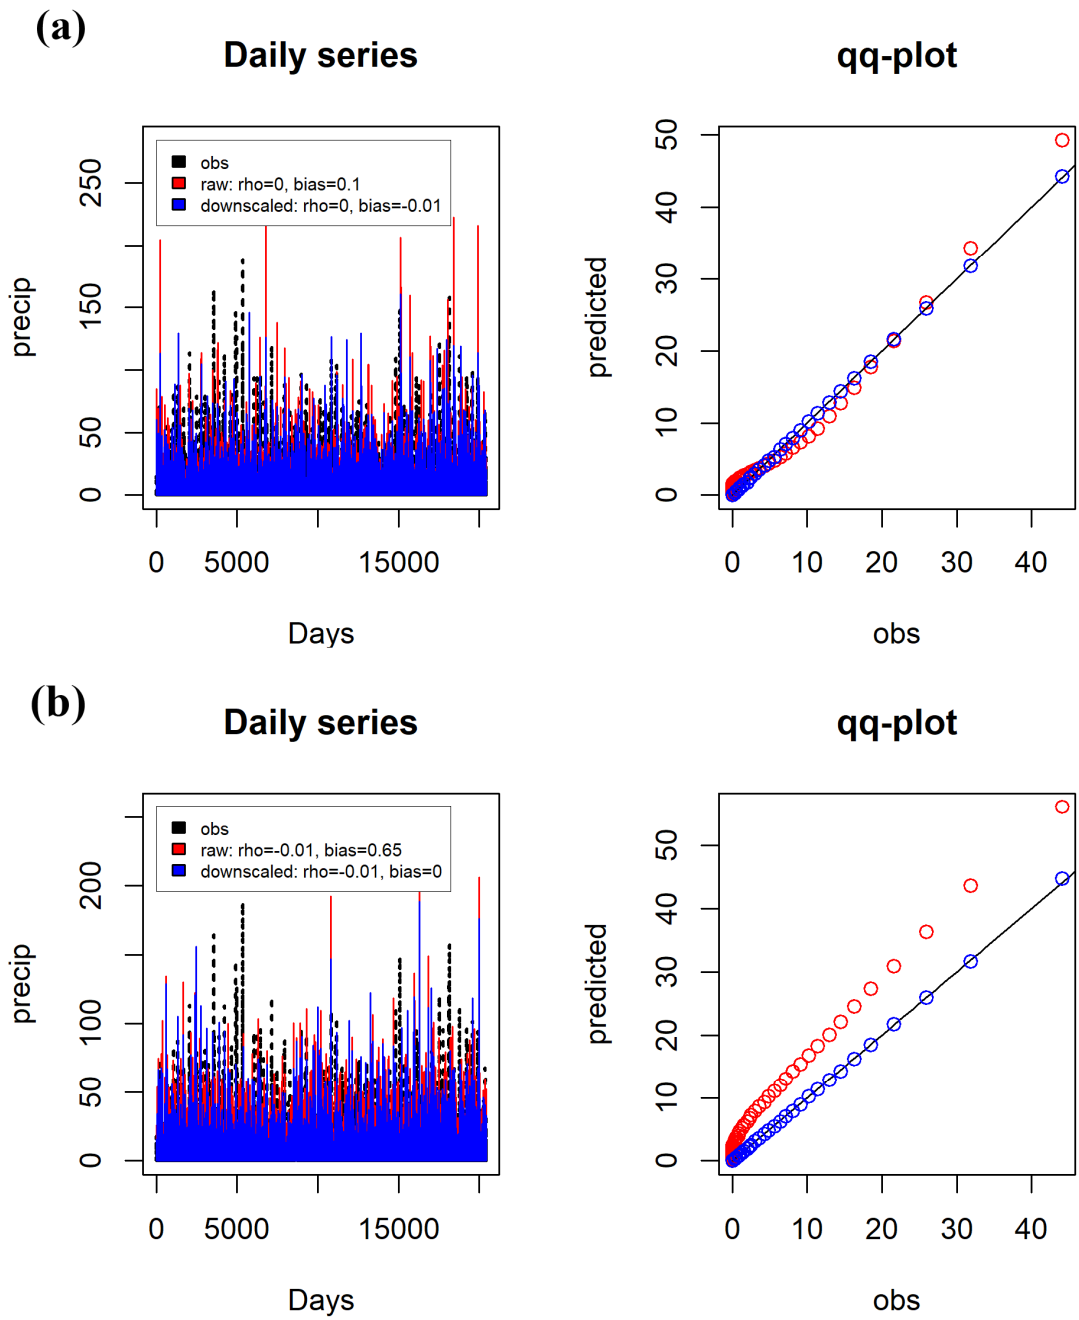

Fig. S2: Bias correction using a Q-Q Plot method for (a) CanESM2\_CanRCM4 and (b) CanESM2\_CRCM5-UQAM. The red is the original model output, and the blue is the bias-corrected model output.

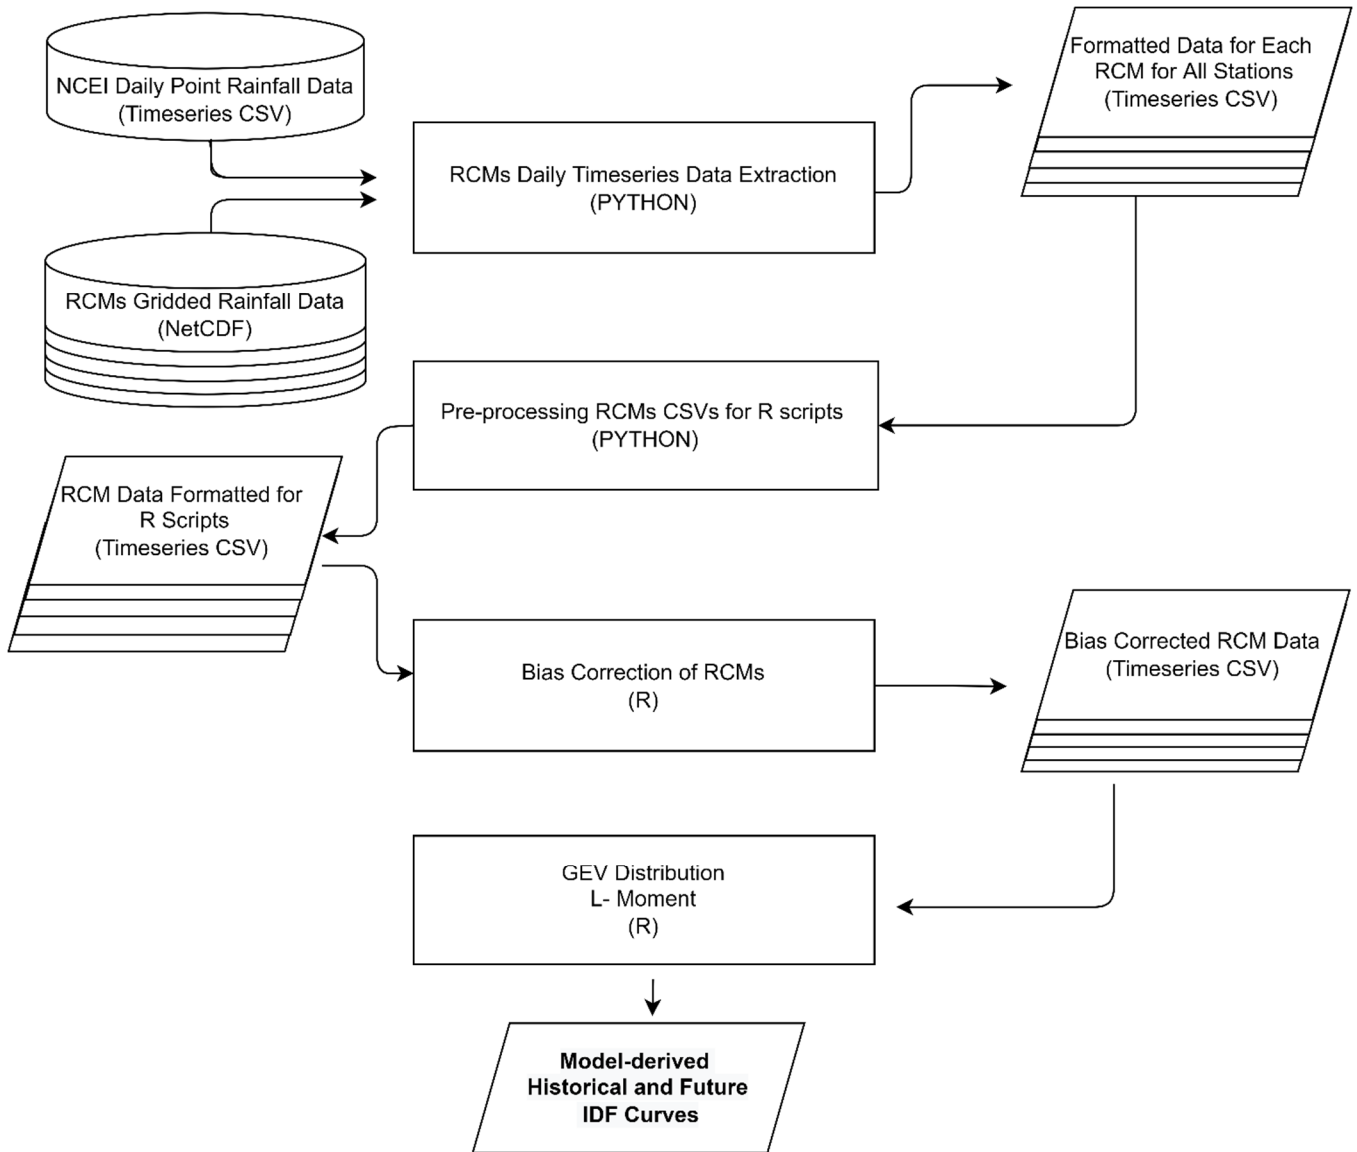

Fig. S3. Workflow for producing model-derived historical and future IDF curves from RCMs data. Analysis steps are shown as rectangles, key input datasets are shown as cylinders, key result datasets are shown as parallelograms and final result is shown as parallelograms with bold font.

G

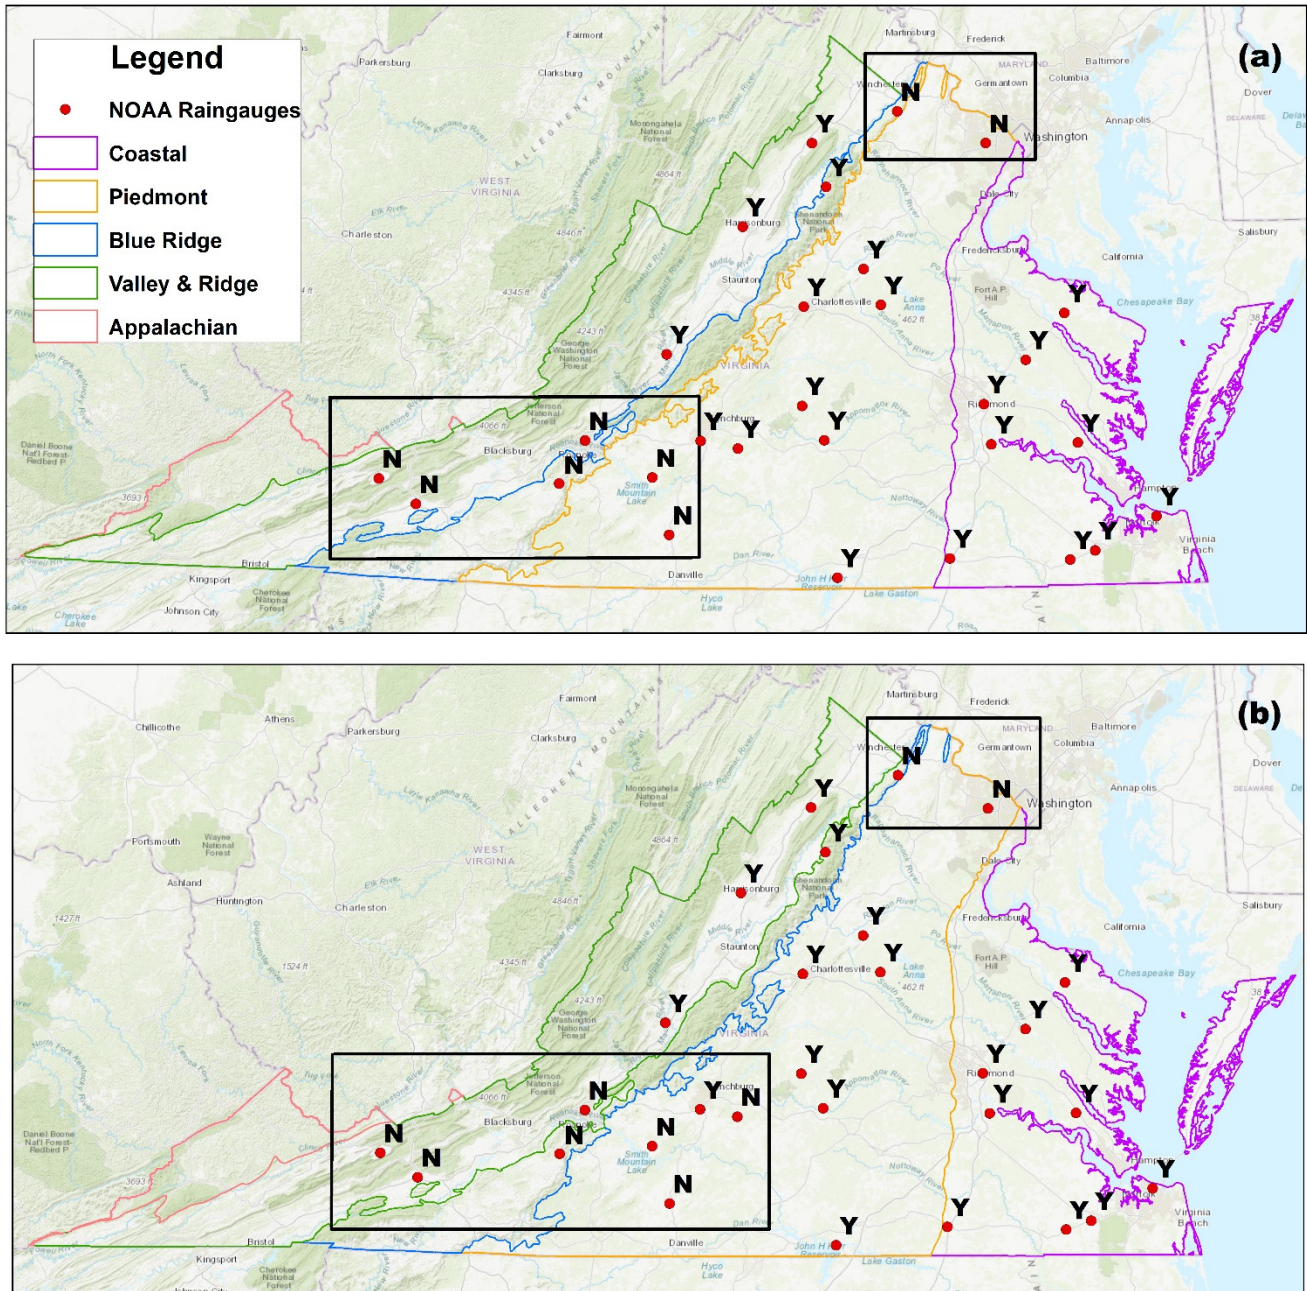

Fig. S4: The comparison between the increase in (a) precipitation (mm) and (b) precipitation (%) for RCP4.5 and RCP8.5. Here, ‘Y’ denotes ‘RCP8.5>RCP4.5’, and ‘N’ donates ‘RCP4.5>RCP8.5’. (Base map from ArcGIS World Topographic Map, Sources: Esri, HERE, Garmin, Intermap, INCREMENT P, GEBCO, USGS, FAO, NPS, NRCAN, GeoBase, IGN, Kadaster NL, Ordnance Survey, Esri Japan, METI, Esri China (Hong Kong), © OpenStreetMap contributors, GIS User Community.)

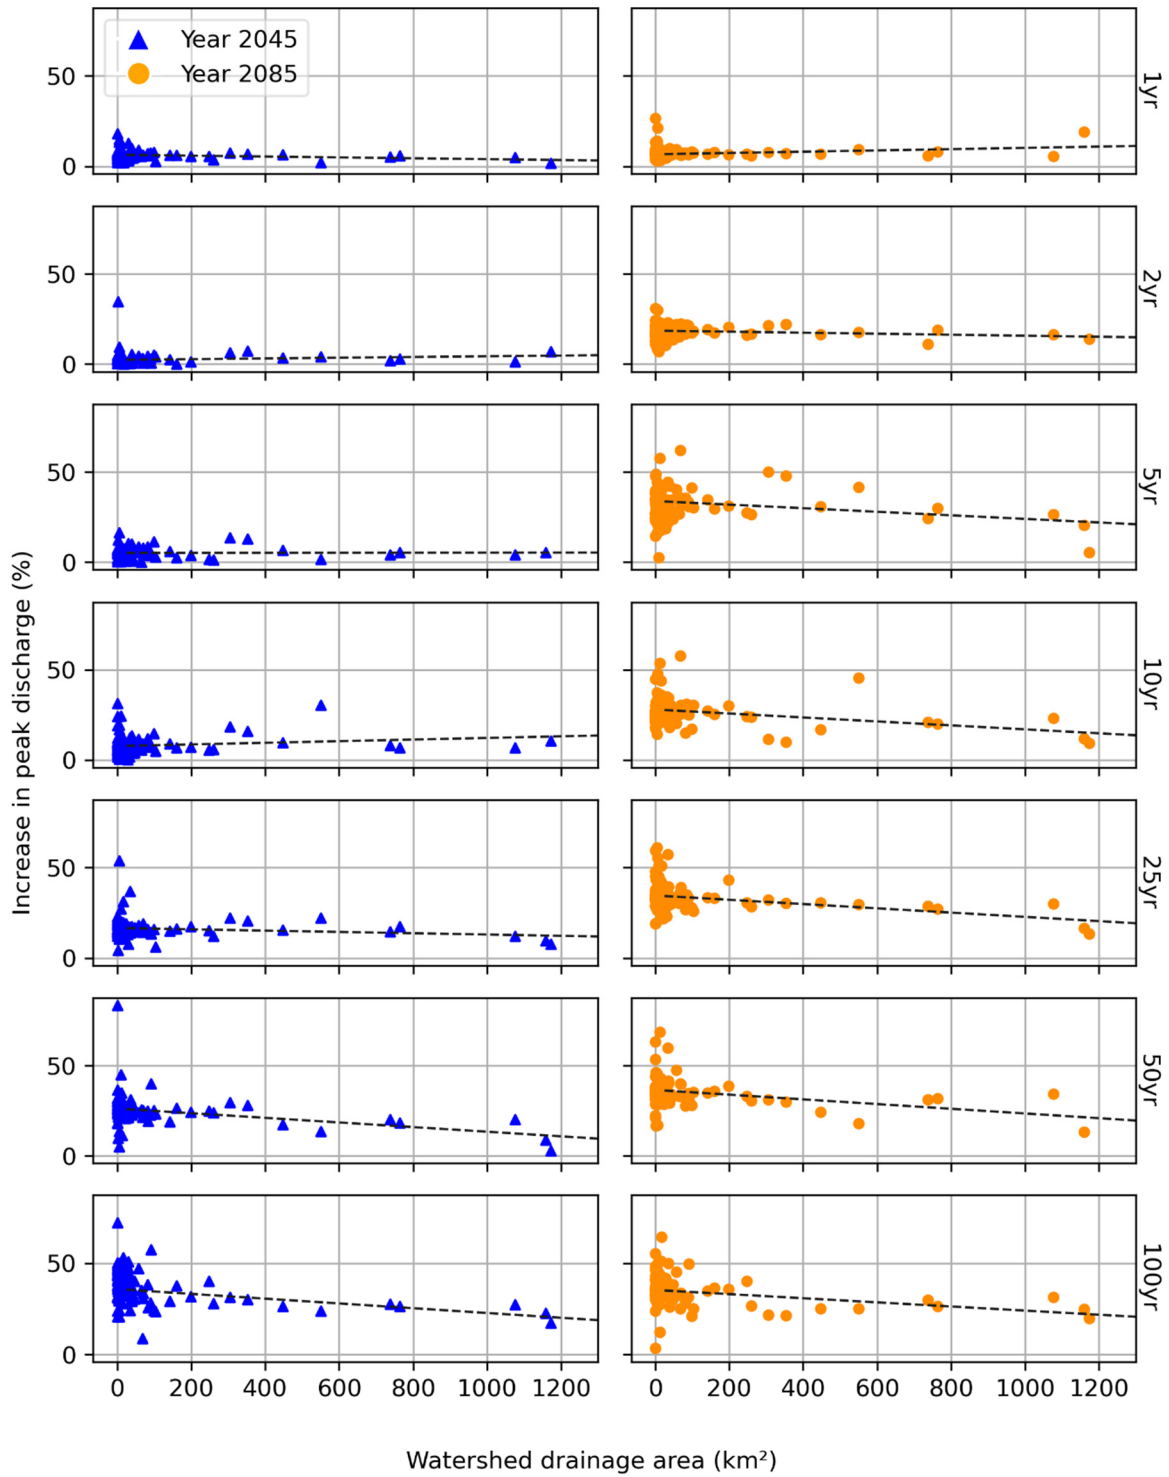

Fig. S5. Percent increase of peak discharge for design storms versus watershed drainage area under RCP4.5. Trendline is for watersheds with drainage area  $> 25 \text{ km}^2$ .



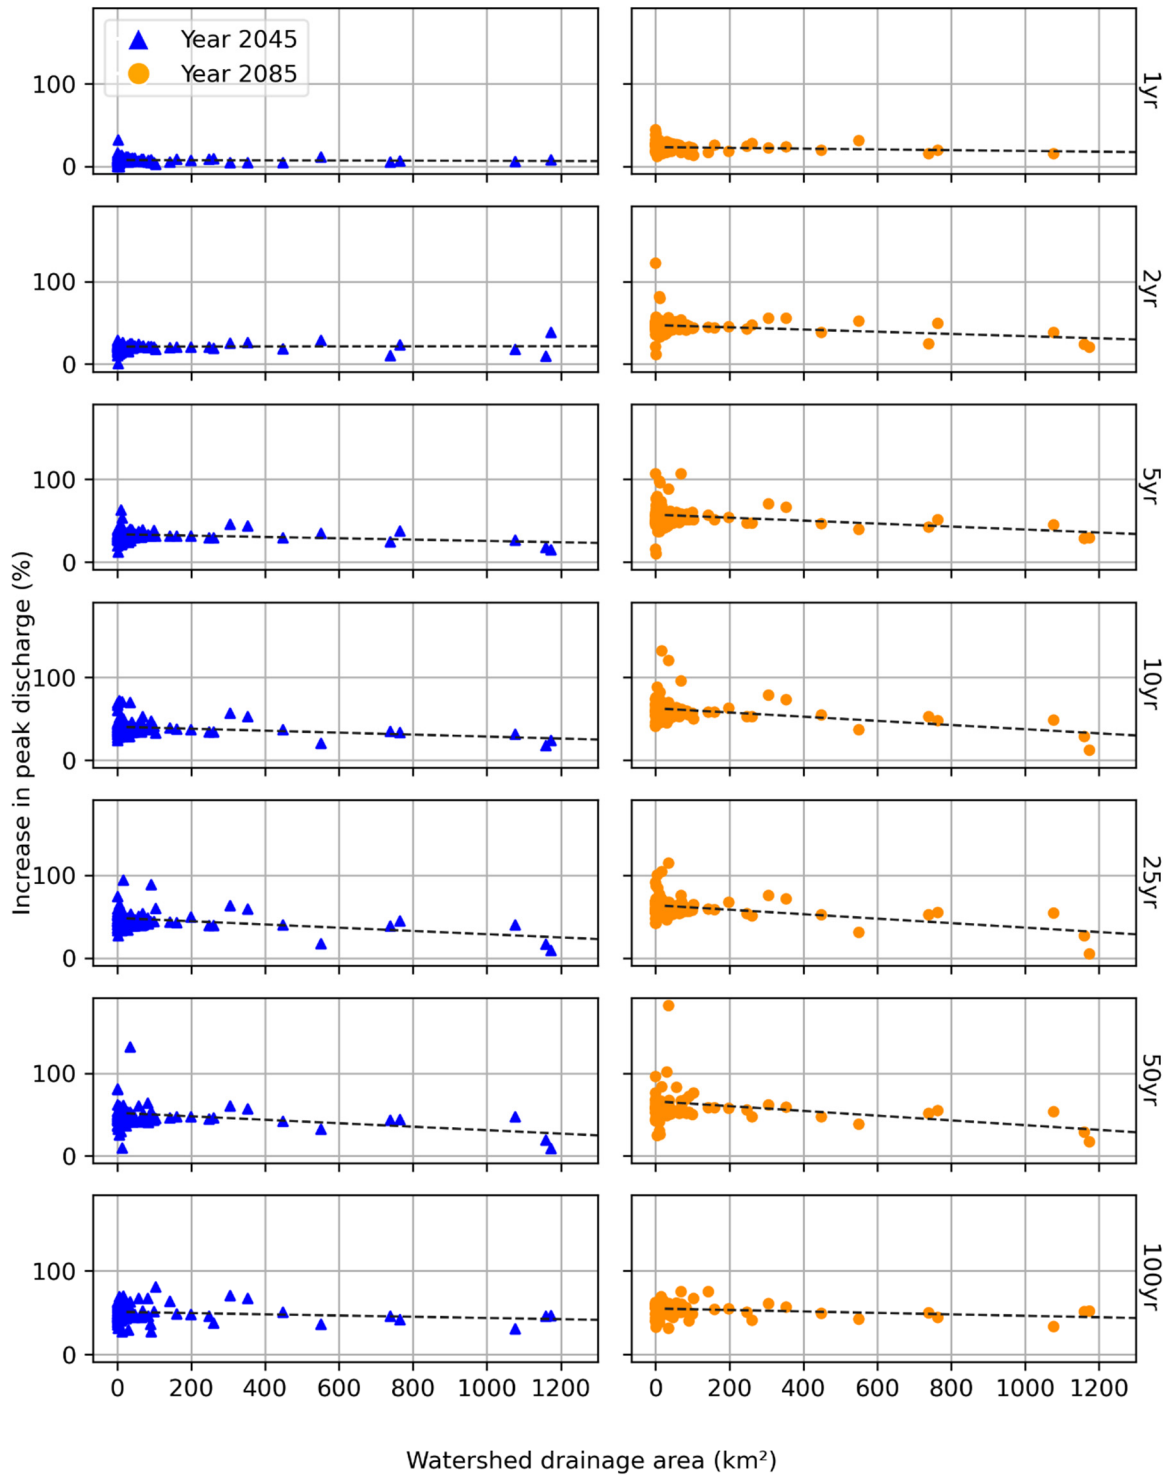

Fig. S6. Percent increase of peak discharge for design storms versus watershed drainage area under RCP8.5. Trendline is for watersheds with drainage area  $> 25 \text{ km}^2$ .
